# Supplementary material for: Association of Genomic Instability with HbA1c levels and Medication in Diabetic Patients
Source: PubMed Central journal article supplement (PMC5288806; doi:10.1038/srep41985), 2017-02-02
Supplement: srep41985-s1.pdf [file srep41985-s1.pdf]

**Supplement**

**Association of Genomic Instability with HbA1c levels and Medication in Diabetic Patients**

Annemarie Grindel, Helmut Brath, Armen Nersesyan, Siegfried Knasmueller, Karl-Heinz Wagner

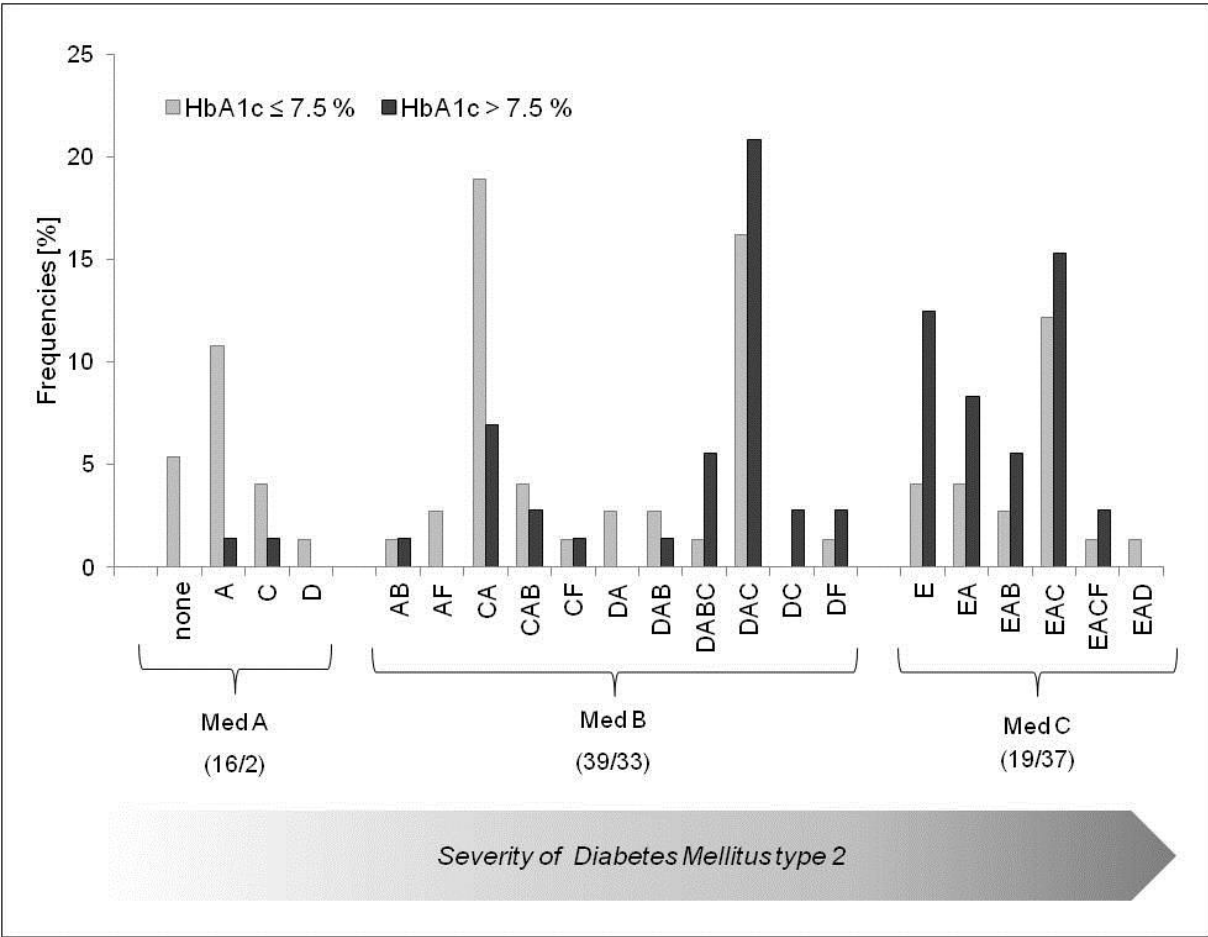

**Figure S1** – Frequencies of medical treatment composition

Prescribed medication of all patients was attributed to six major medical drug classes indicated by different letters A-F. A – Metformin; B – SGLT2 inhibitors; C – DPP-4 inhibitors and GLP-1 receptor agonists; D – sulfonylurea and glinides; E – insulin; F – others (including alpha-glucosidase inhibitors, thiazolidinediones). Single letters indicate monotherapy. Several letters indicate the combination of these medical drug classes. Three medication groups were created for ongoing statistical analyses. Med A included patients under no medical treatment and non-insulin monotherapy; Med B included patients under non-insulin combination therapy; Med C included patients under insulin treatment (with or without other non-insulin medication).

Bars show frequencies in percentage. Numbers in brackets indicate total amount of patients in each medication group, while first number indicates patients with HbA1c ≤ 7.5 % and second number indicates patients with HbA1c > 7.5 %.

**Table S1** – Characteristics of healthy, female control group

|                          | Controls |   |     |
|--------------------------|----------|---|-----|
|                          | n=15     |   |     |
|                          | mean     | ± | SD  |
| Age [years]              | 62.6     | ± | 5.8 |
| BMI [kg/m <sup>2</sup> ] | 28.5     | ± | 3.7 |
| Waist circumference [cm] | 94.8     | ± | 8.8 |
| FPG [mmol/L]             | 5.49     | ± | 0.4 |
| HbA1c [%]                | 5.76     | ± | 0.3 |
| Insulin [pmol/L]         | 43.4     | ± | 42  |
| C-Peptide [nmol/L]       | 0.75     | ± | 0.3 |
| HOMA-IR                  | 1.52     | ± | 1.4 |
| Cobalamin [pmol/L]       | 469      | ± | 206 |
| Folic acid [nmol/L]      | 22.3     | ± | 6.7 |
| Ex-smokers [%]           | 33.3     |   |     |

|                                        | HbA1c ≤ 7.5 %             |                          |                         | HbA1c > 7.5 %           |                           |
|----------------------------------------|---------------------------|--------------------------|-------------------------|-------------------------|---------------------------|
|                                        | Med A<br>n=16             | Med B<br>n=39            | Med C<br>n=19           | Med B<br>n=33           | Med C<br>n=37             |
|                                        | <i>mean ± sd</i>          | <i>mean ± sd</i>         | <i>mean ± sd</i>        | <i>mean ± sd</i>        | <i>mean ± sd</i>          |
| <b>General characteristics</b>         |                           |                          |                         |                         |                           |
| <i>Age [y]</i>                         | 70.0 ± 9.5                | 66.8 ± 11                | 71.4 ± 7.0              | 66.8 ± 9.2              | 65.3 ± 11                 |
| <i>Weight [kg]</i>                     | 79.2 ± 16                 | 83.9 ± 21                | 89.0 ± 17               | 88.7 ± 16               | 94.4 ± 23                 |
| <i>BMI [kg/m<sup>2</sup>]</i>          | 31.4 ± 6.2                | 34.1 ± 8.6               | 34.8 ± 5.5              | 35.0 ± 5.9              | 37.6 ± 8.7                |
| <i>Waist circumference [cm]</i>        | 97.3 ± 14                 | 103 ± 15                 | 107 ± 13                | 105 ± 12                | 110 ± 15                  |
| <i>Hip circumference [cm]</i>          | 114 ± 14                  | 116 ± 16                 | 119 ± 13                | 119 ± 13                | 123 ± 17                  |
| <i>Waist-to-hip ratio</i>              | 0.85 ± 0.0 <sup>ab</sup>  | 0.89 ± 0.0               | 0.89 ± 0.0              | 0.88 ± 0.0 <sup>a</sup> | 0.89 ± 0.1 <sup>b</sup>   |
| <i>Blood pressure systolic [mmHg]</i>  | 140 ± 23                  | 137 ± 15                 | 138 ± 25                | 146 ± 16                | 146 ± 20                  |
| <i>Blood pressure diastolic [mmHg]</i> | 83.7 ± 13                 | 82.6 ± 10                | 78.5 ± 12               | 84.9 ± 10               | 81.9 ± 9.5                |
| <i>Diabetes duration [y]</i>           | 10.1 ± 6.4 <sup>a</sup>   | 14.1 ± 10                | 15.6 ± 6.5              | 13.5 ± 6.0              | 16.5 ± 7.8 <sup>a</sup>   |
| <i>Fasting plasma glucose [mmol/L]</i> | 6.52 ± 1.2 <sup>abc</sup> | 8.36 ± 1.5 <sup>ad</sup> | 8.24 ± 1.8 <sup>e</sup> | 9.58 ± 1.5 <sup>b</sup> | 10.6 ± 2.3 <sup>cde</sup> |
| <i>Fasting insulin [pmol/L]</i>        | 94.2 ± 85                 | 95.0 ± 54                | 171 ± 138               | 135 ± 133               | 122 ± 65                  |
| <i>C-peptide [nmol/L]</i>              | 0.96 ± 0.6                | 1.13 ± 0.5 <sup>a</sup>  | 0.90 ± 0.6              | 1.33 ± 0.8 <sup>b</sup> | 0.74 ± 0.5 <sup>ab</sup>  |
| <i>HOMA-IR</i>                         | 1.83 ± 1.5                | 2.40 ± 3.0               | 3.18 ± 2.0              | 2.62 ± 2.1              | 2.80 ± 1.6                |
| <i>Cobalamin [pmol/L]</i>              | 222 ± 83                  | 338 ± 196                | 326 ± 210               | 259 ± 111               | 337 ± 158                 |
| <i>Folic acid [nmol/L]</i>             | 27.2 ± 17                 | 20.7 ± 13                | 18.2 ± 6.0              | 16.7 ± 8.8              | 20.1 ± 11                 |
| <i>Total cholesterol [mmol/L]</i>      | 4.46 ± 0.6                | 4.10 ± 0.7               | 3.99 ± 0.5              | 4.34 ± 0.8              | 4.60 ± 1.1                |
| <i>HDL cholesterol [mmol/L]</i>        | 1.57 ± 0.5                | 1.42 ± 0.4               | 1.41 ± 0.4              | 1.31 ± 0.3              | 1.26 ± 0.3                |
| <i>LDL cholesterol [mmol/L]</i>        | 2.29 ± 0.6                | 2.04 ± 0.5               | 1.78 ± 0.5 <sup>a</sup> | 2.25 ± 0.7              | 2.41 ± 0.9 <sup>a</sup>   |
| <i>Triglycerides [mmol/L]</i>          | 1.40 ± 1.0                | 1.39 ± 0.6               | 1.74 ± 0.8              | 1.71 ± 0.7              | 2.35 ± 2.4                |
| <i>Framingham risk score [%]</i>       | 12.8 ± 7.6                | 10.8 ± 4.7               | 12.4 ± 6.6              | 14.6 ± 7.0              | 15.1 ± 7.7                |
| <b>Genomic damage</b>                  |                           |                          |                         |                         |                           |
| <i>Basal cells [‰]</i>                 | 9.06 ± 2.6                | 8.62 ± 3.0               | 6.95 ± 2.6              | 8.30 ± 4.1              | 9.16 ± 2.9                |
| <i>Micronuclei in cells [‰]</i>        | 0.65 ± 0.3 <sup>a</sup>   | 0.83 ± 0.3               | 0.84 ± 0.2              | 1.04 ± 0.7              | 1.34 ± 0.8 <sup>a</sup>   |
| <i>Total Micronuclei [‰]</i>           | 0.68 ± 0.3 <sup>ab</sup>  | 0.86 ± 0.3 <sup>c</sup>  | 0.95 ± 0.4              | 1.60 ± 1.3 <sup>b</sup> | 2.06 ± 1.5 <sup>ac</sup>  |
| <i>Binucleated cells [‰]</i>           | 22.4 ± 9.0                | 25.4 ± 9.5               | 26.4 ± 12.6             | 24.2 ± 7.9              | 24.6 ± 9.8                |
| <i>Nuclear buds [‰]</i>                | 2.75 ± 1.3                | 2.69 ± 1.0               | 2.74 ± 1.0              | 3.10 ± 1.3              | 3.00 ± 1.1                |
| <i>Karyorrhexis [‰]</i>                | 20.2 ± 7.2                | 26.1 ± 8.5               | 22.2 ± 9.0              | 22.8 ± 7.2              | 23.3 ± 6.3                |
| <i>Condensed Chromatin [‰]</i>         | 28.1 ± 13                 | 23.4 ± 11                | 27.4 ± 9.7              | 21.5 ± 9.6              | 25.2 ± 10                 |
| <i>Karyolysis [‰]</i>                  | 33.1 ± 10 <sup>a</sup>    | 33.2 ± 13 <sup>bc</sup>  | 33.2 ± 14 <sup>d</sup>  | 47.8 ± 24 <sup>b</sup>  | 46.6 ± 16 <sup>acd</sup>  |
| <i>Pyknosis [‰]</i>                    | 1.44 ± 1.5                | 1.26 ± 1.0               | 1.21 ± 0.9              | 1.00 ± 0.8              | 1.35 ± 0.7                |

**Table S2** Differences in general characteristics and genomic damage between Med groups divided by HbA1c threshold of 7.5%

Pairwise comparisons were tested with one-way Anova with Bonferroni adjustment or Kruskal-Wallis Test for nonparametric data. Identical letters a, b, c, d indicate significant differences between the respective groups. Significance was assumed with p<0.05.
